# Supplementary material
Source: PubMed Central journal article supplement (PMC3121314)
Supplement: NIHMS291034-supplement-1_si_001.pdf [file NIHMS291034-supplement-1_si_001.pdf]

Figure S1

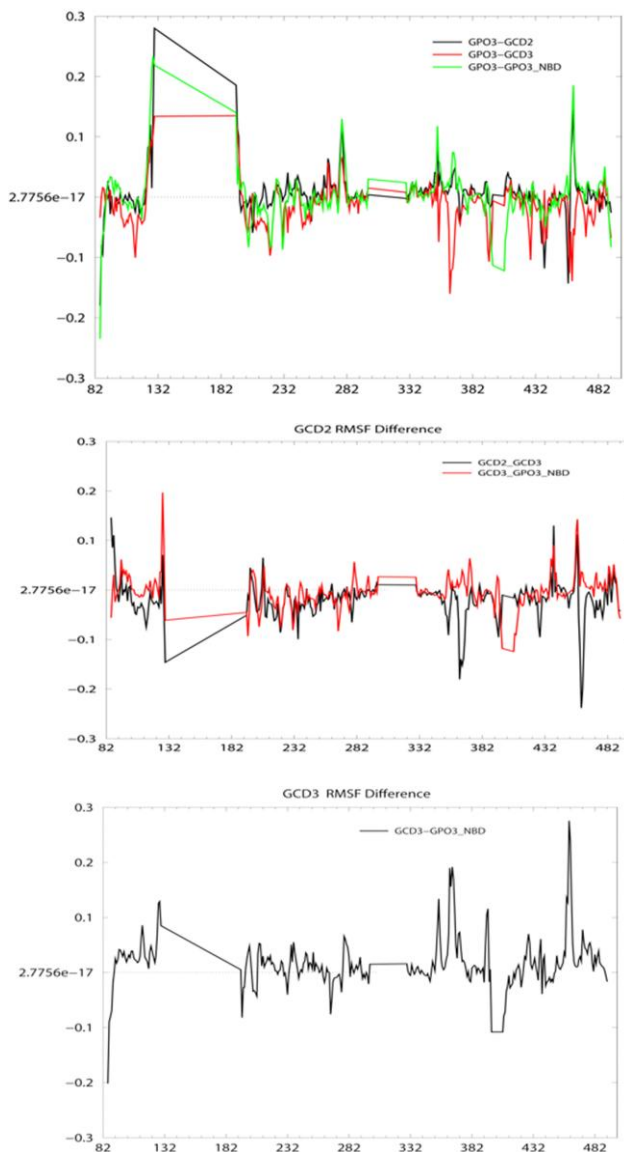

Figure S1. The difference plots of the Root Mean Square Fluctuations (RMSF) between the respective simulations. **A.** Difference plot of GPO3 and GCD2 (black curve), GCD3 (red curve) and GPO3\_NBD (green curve). Negative values indicate the motions in GPO3 are reduced relative to the structure to which it is being compared. **B.** Difference plot of GCD2 and GCD3 (black curve) and GPO3\_NBD (red curve). **C.** Difference plot of GCD3 and GPO3\_NBD.

Figure S2

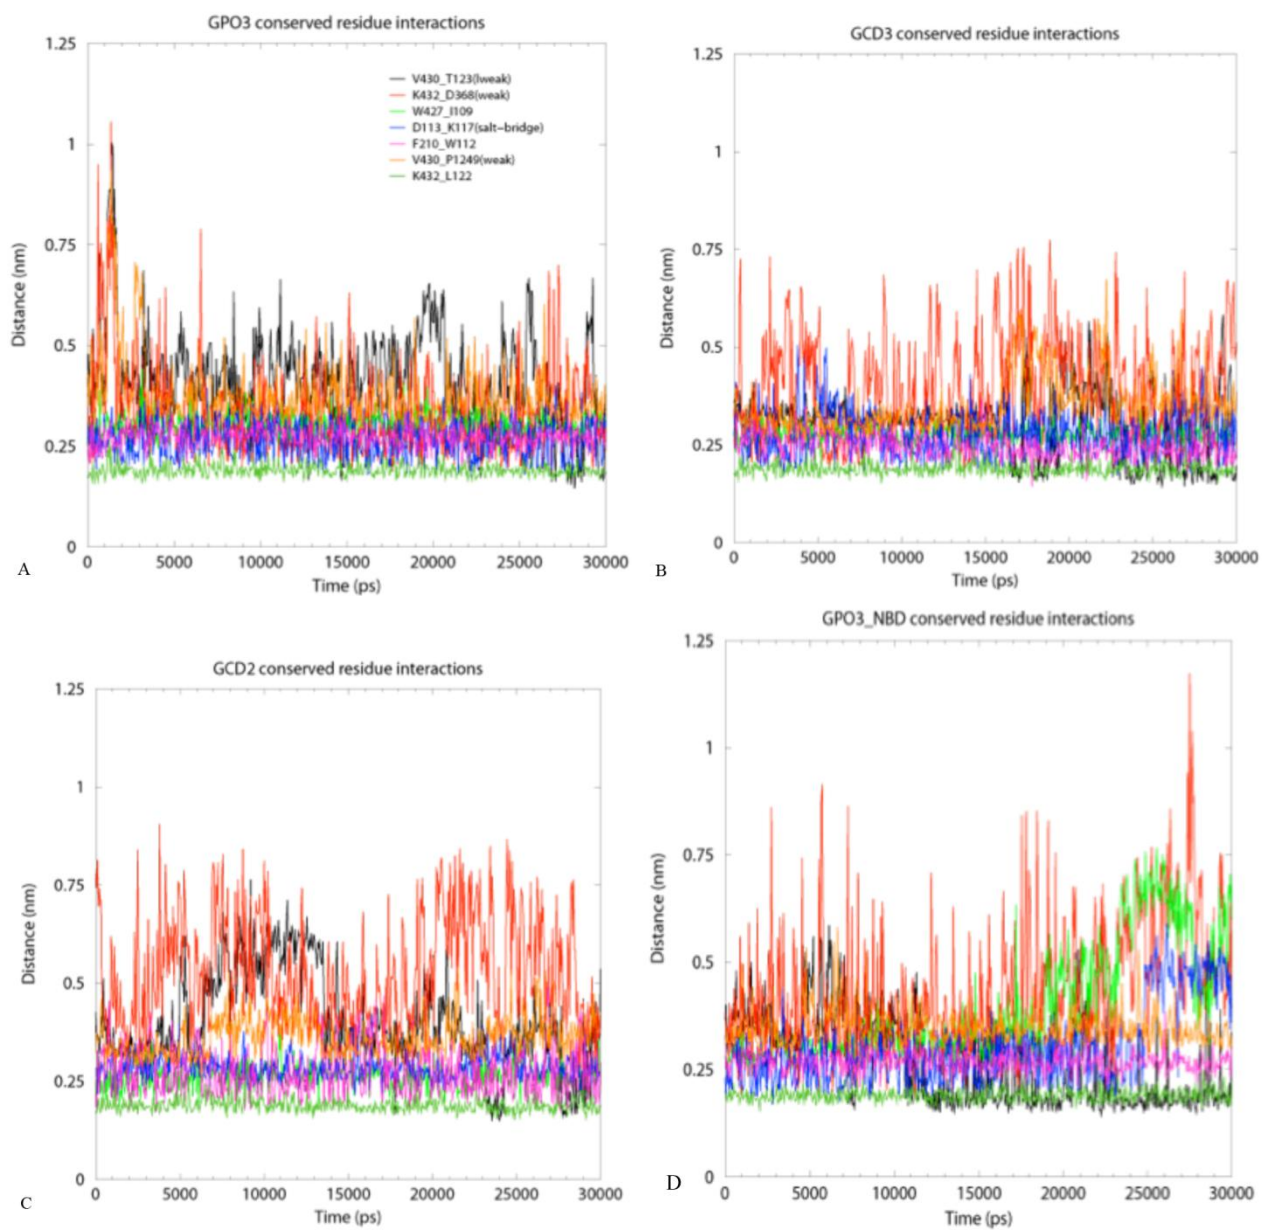

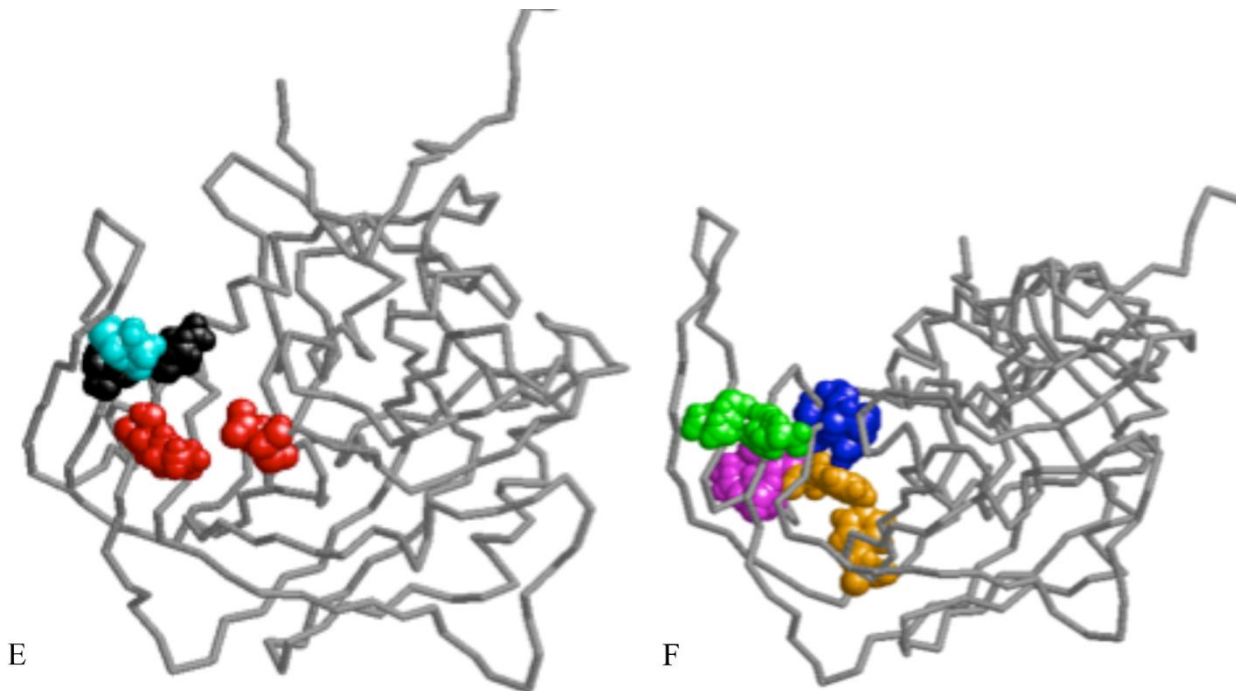

**Figure S3.** Intra-residues distances (nm) of interacting residues pairs for the residues conserved in the gp120 amino-acid sequence. V430 to T123 (black), K432-D368 (pink), W427-I109 (light green), D113-K117 (blue), F210-W112 (magenta), V320-P124 (orange) and K432-L122 (dark green) for the four constructs, GPO3 (**A**), GCD2 (**B**), GCD3 (**C**) and GPO3\_NBD (**D**). Loose Interactions (**E**) are observed for V430-T123, K432-D368, V430-P124, while tight interactions (**F**) are seen for F210-W112, W427-I109, D113-K117 and K432-L122

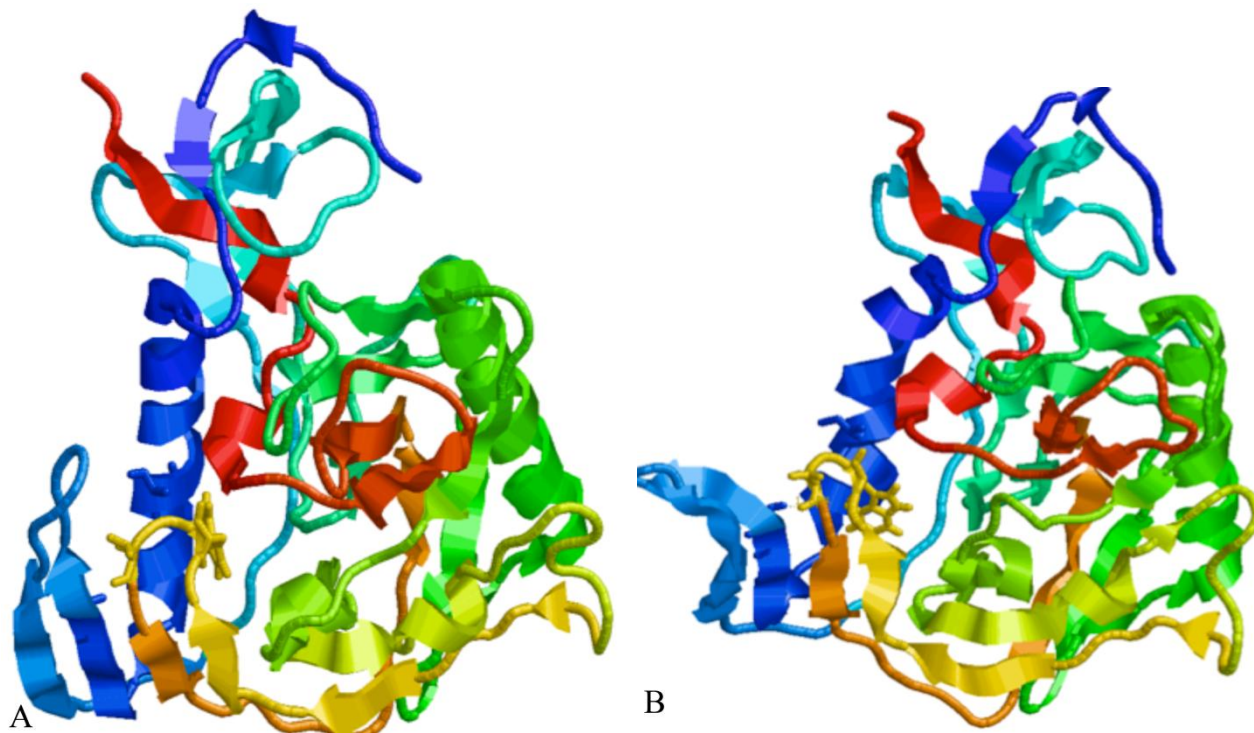

**Figure S2.** **A**) Ribbon diagram of snapshots of GPO3\_NBD simulation showing W427 and I109 on the bridging sheet  $\beta$ -20/ $\beta$ -21 at **(A)**  $t=10$  ns and **(B)**  $t=2$  ns. The increase in distance between W427 and I109 seen in the simulation is a consequence of the movement of W427 away from the Phe 43 cavity.

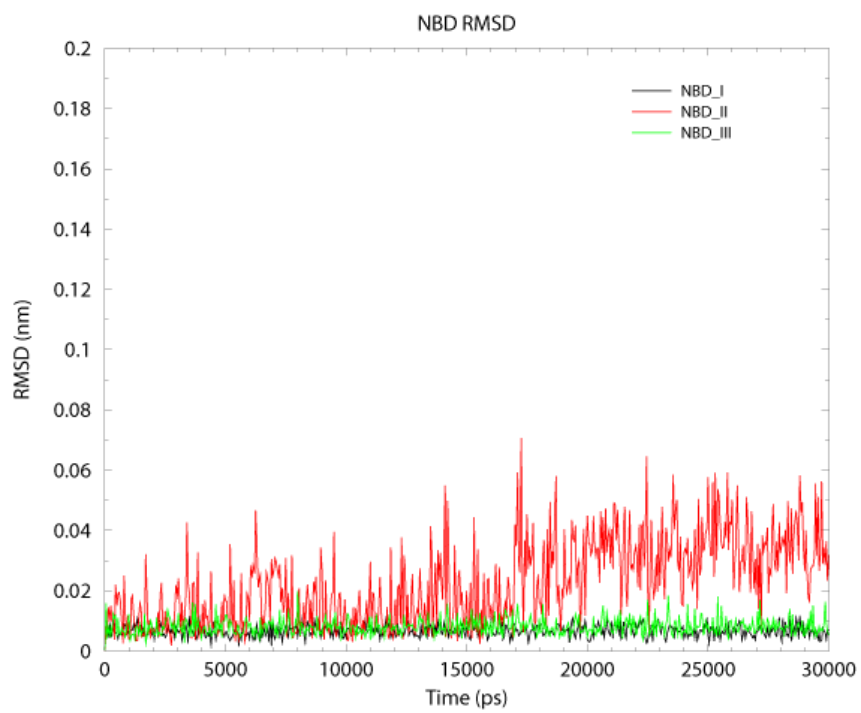

**Figure S4.** RMSDs plotted for the three NBD-556 Region I (black), Region II (red) and Region III (green).

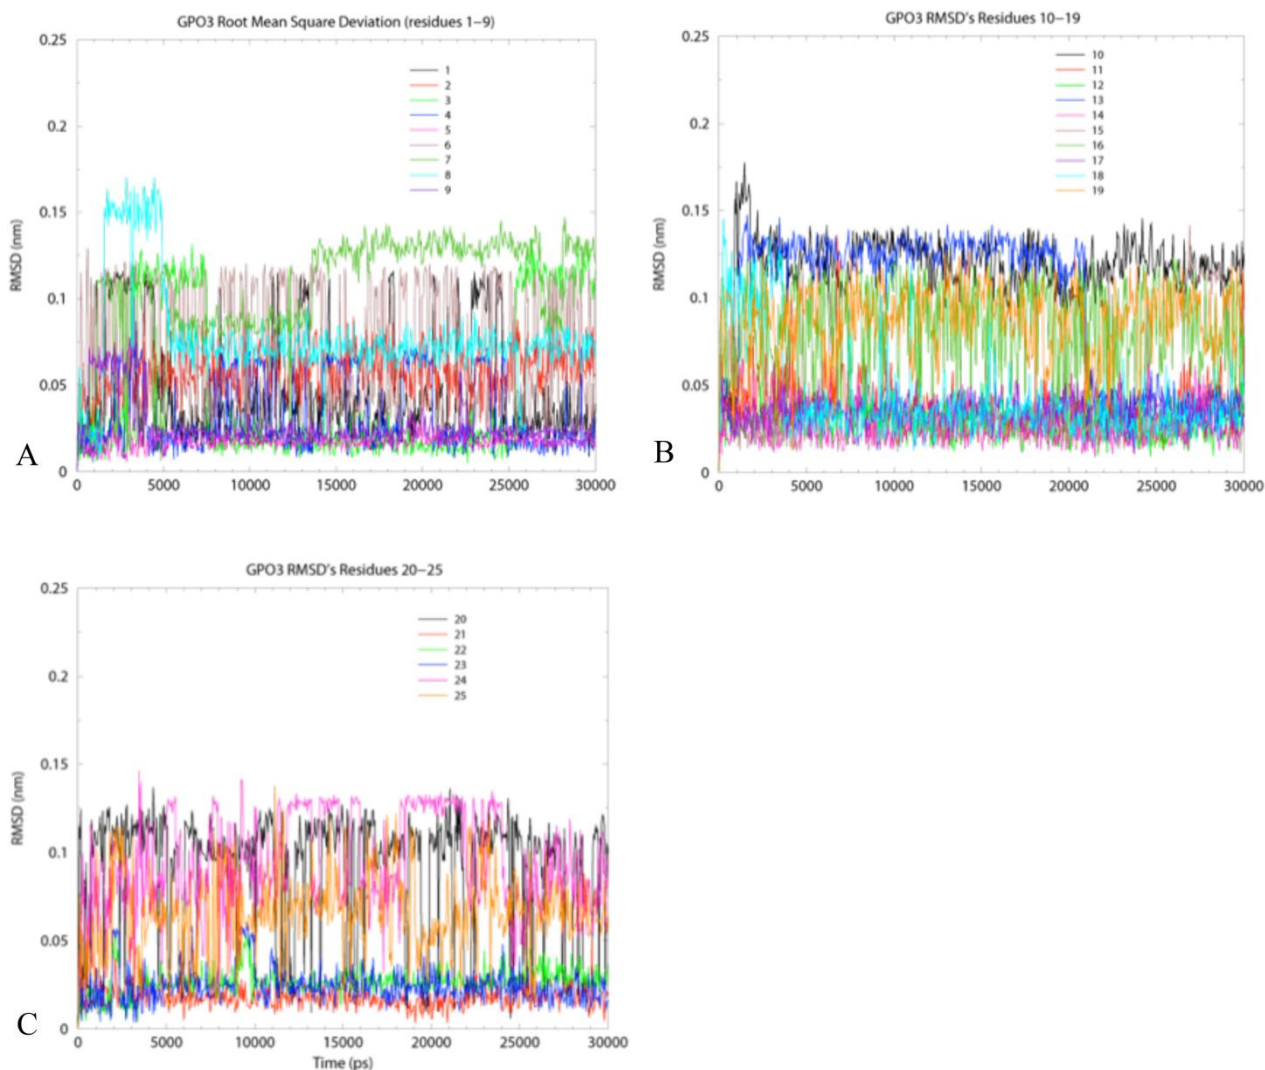

**Figure S5.** RMSDs for the 25 residues that form the Phe 43 cavity of GPO3 and are within 4.5 Å of NBD-556 as predicted by docking. **A)** Residues are: 1-H105, 2-W112, 3-V255, 4-S256, 5-T257, 6 -D368 , 7-E370, 8-I371, 9-S375 **B)** Residues are: 10-F376, 11-N377, 12 -F382, 13-Y384, 14-I424, 15-N425, 16-M426, 17-W427, 18-Q428, 19-E429 **C)** Residues are: 20-V430, 21-G431, 22-G472, 23-G473, 24-D474, 25- M475.



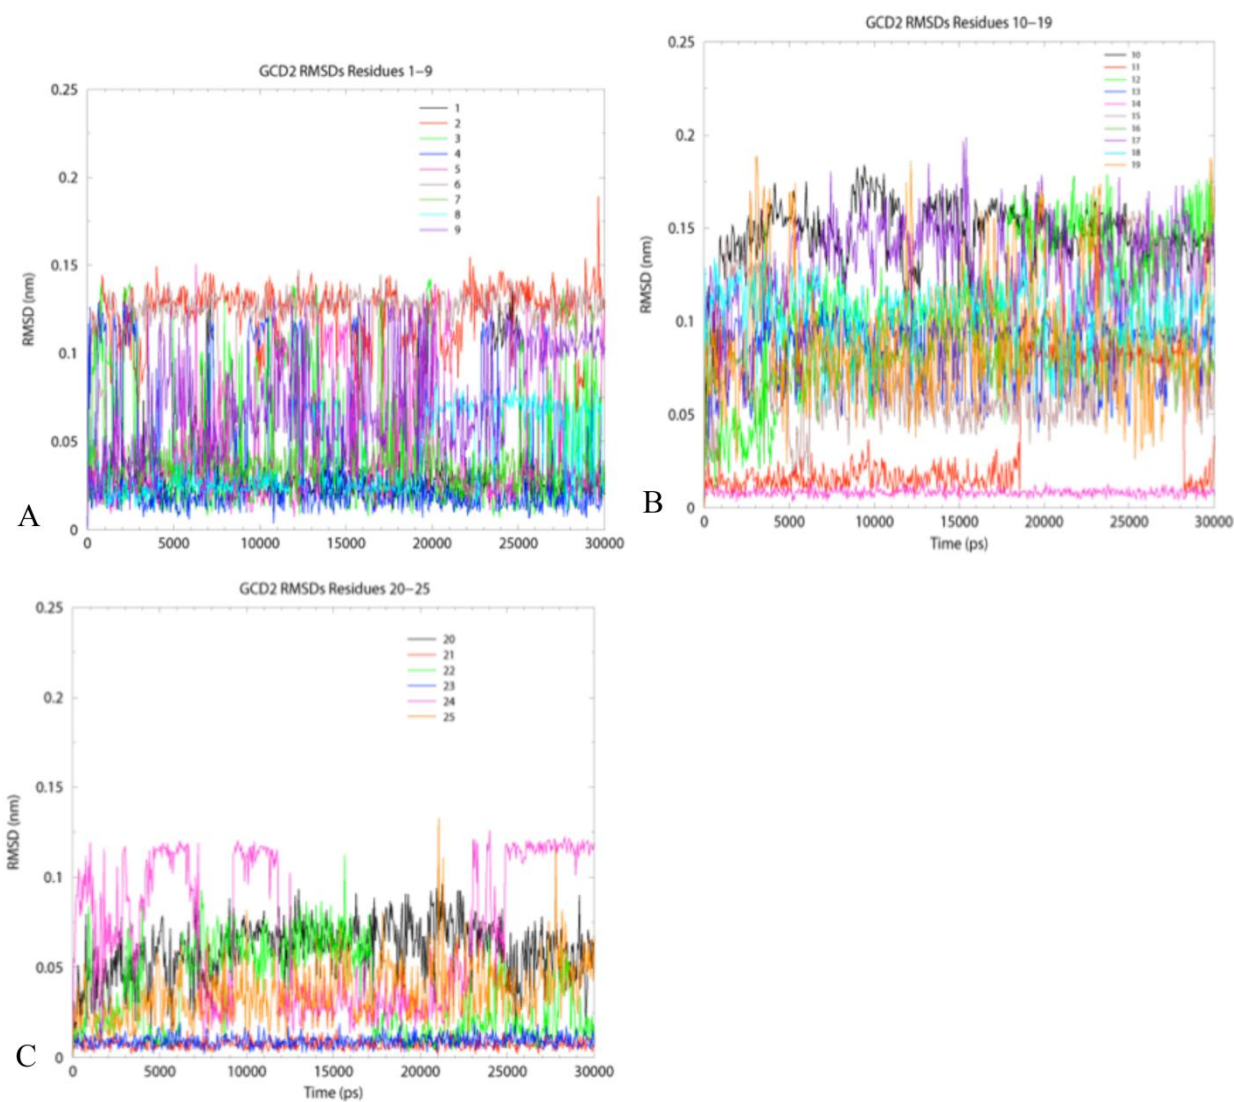

**Figure S6.** RMSDs for the 25 residues that form the Phe 43 cavity of GCD2 and are within 4.5 Å of NBD-556 as predicted by docking. A) Residues are: 1-H105, 2-W112, 3-V255, 4-S256, 5-T257, 6 -D368 , 7-E370, 8-I371, 9-S375 B) Residues are: 10-F376, 11-N377, 12 -F382, 13-Y384, 14-I424, 15-N425, 16-M426, 17-W427, 18-Q428, 19-E429 C) Residues are: 20-V430, 21-G431, 22-G472, 23-G473, 24-D474, 25- M475.

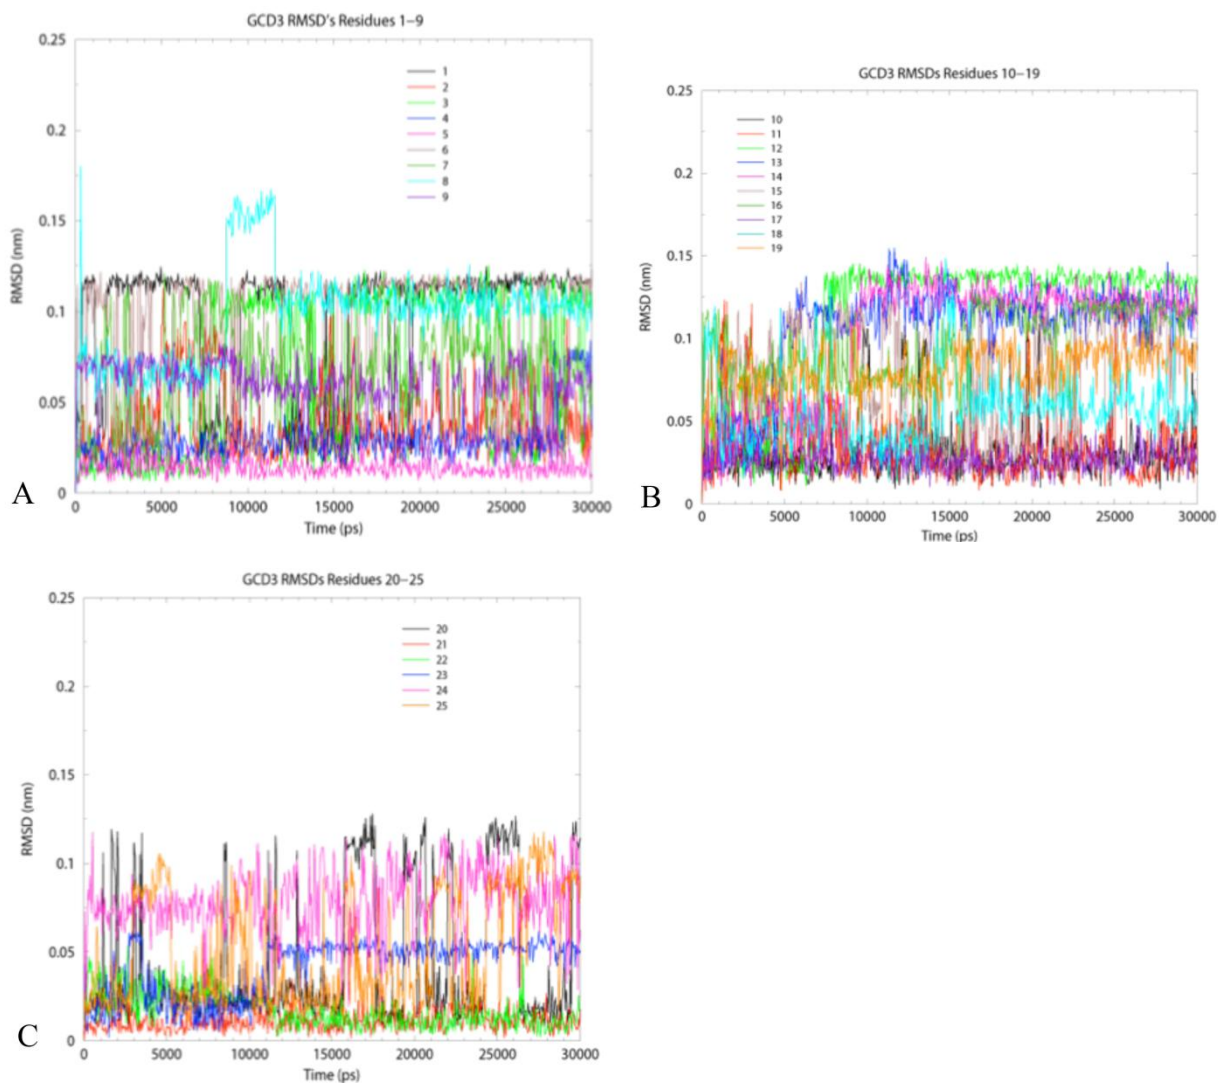

**Figure S7.** RMSDs for the 25 residues that form the Phe 43 cavity of GCD3 and are within 4.5 Å of NBD-556 as predicted by docking. A) Residues are: 1-H105, 2-W112, 3-V255, 4-S256, 5-T257, 6-D368, 7-E370, 8-I371, 9-S375 B) Residues are: 10-F376, 11-N377, 12-F382, 13-Y384, 14-I424, 15-N425, 16-M426, 17-W427, 18-Q428, 19-E429 C) Residues are: 20-V430, 21-G431, 22-G472, 23-G473, 24-D474, 25-M475

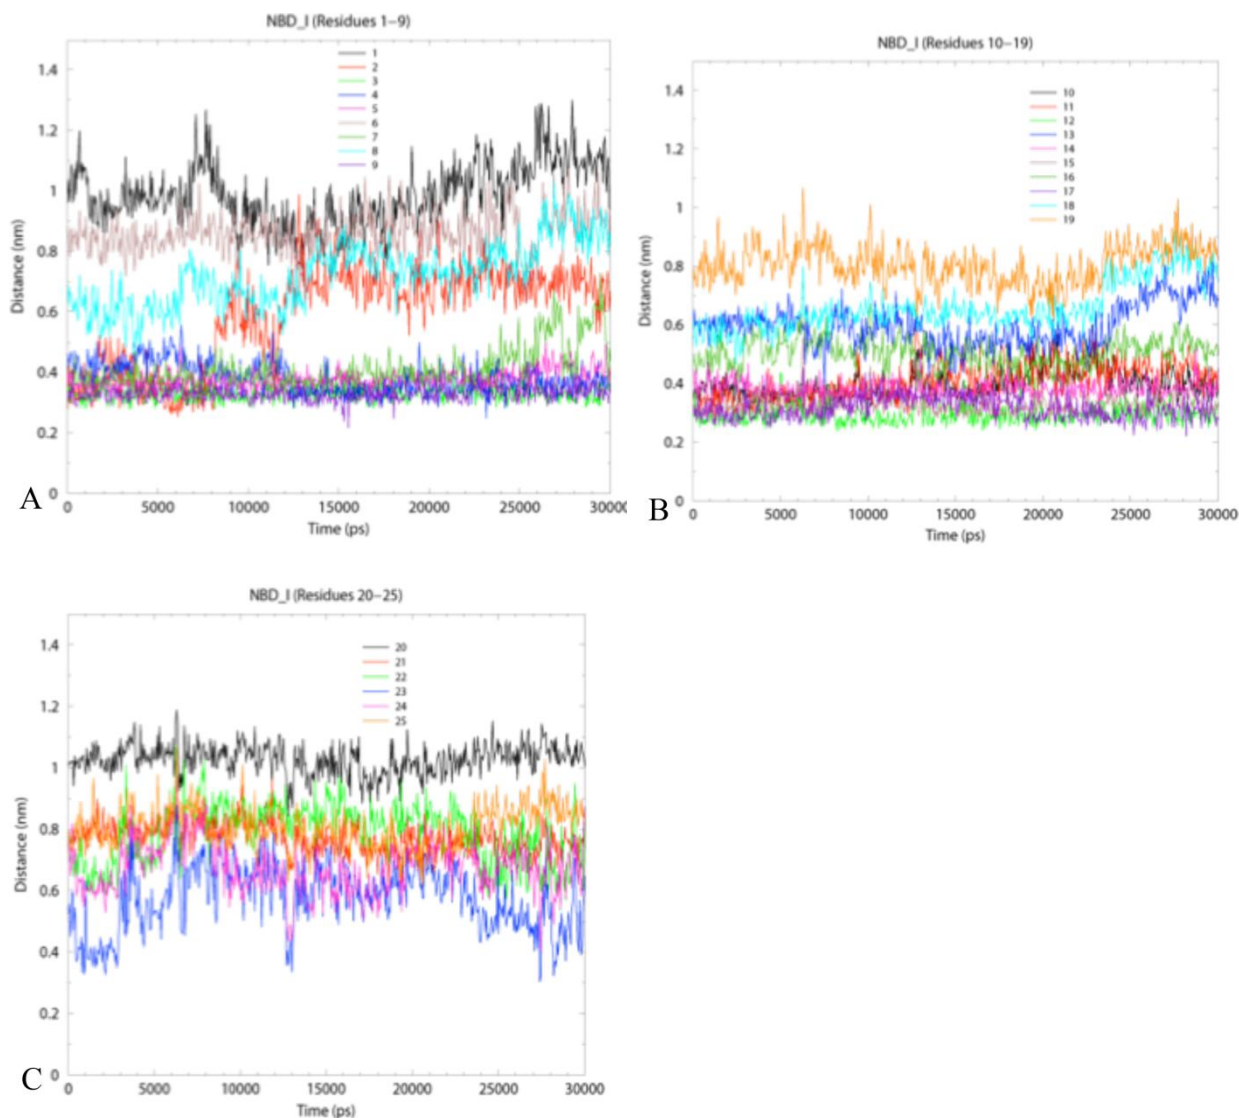

**Figure S8.** The pair wise residue ( $c-\alpha$ ) distances between NBD Region I plotted for the 25 residues of the Phe-43 cavity for GPO3\_NBD. **A)** Residues are: 1-H105, 2-W112, 3-V255, 4-S256, 5-T257, 6-D368, 7-E370, 8-I371, 9-S375 **B)** Residues are: 10-F376, 11-N377, 12-F382, 13-Y384, 14-I424, 15-N425, 16-M426, 17-W427, 18-Q428, 19-E429 **C)** Residues are: 20-V430, 21-G431, 22-G472, 23-G473, 24-D474, 25-M475.

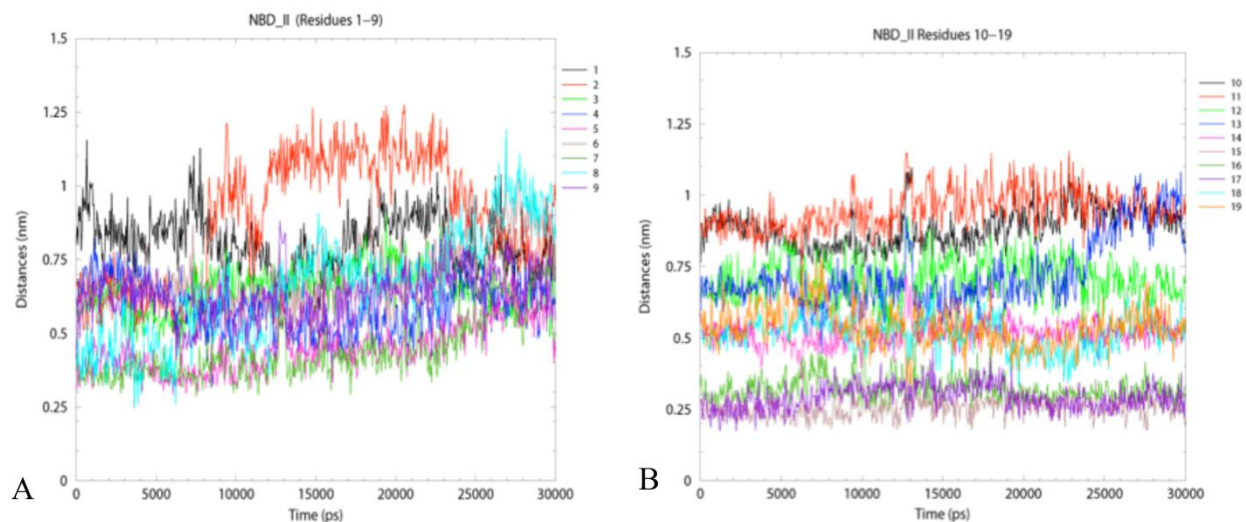



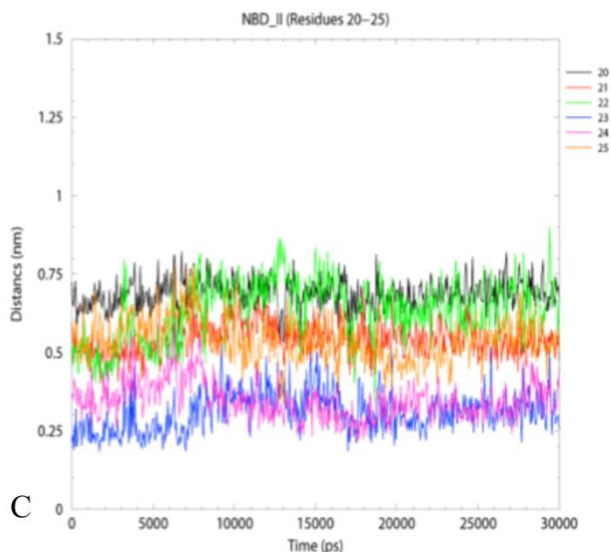

**Figure S9** The pair wise residue (C- $\alpha$ ) distances between NBD Region II plotted for the 25 residues of the Phe-43 cavity for GPO3\_NBD. **A)** Residues are: 1-H105, 2-W112, 3-V255, 4-S256, 5-T257, 6 -D368 , 7-E370, 8-I371, 9-S375 **B)** Residues are: 10-F376, 11-N377, 12 -F382, 13-Y384, 14-I424, 15-N425, 16-M426, 17-W427, 18-Q428, 19-E429 **C)** Residues are: 20-V430, 21-G431, 22-G472, 23-G473, 24-D474, 25- M475.

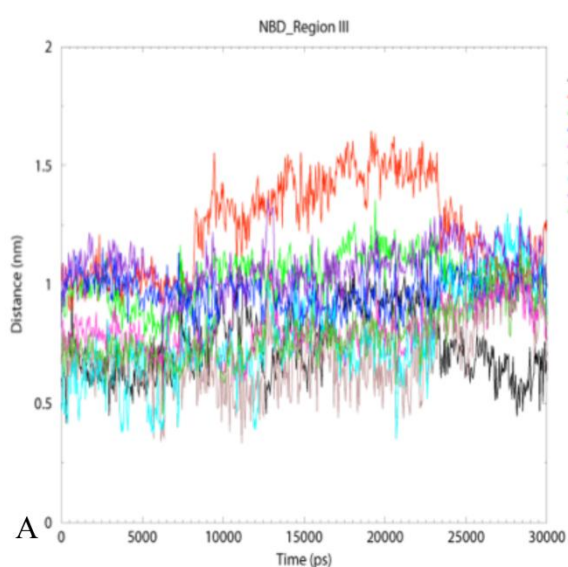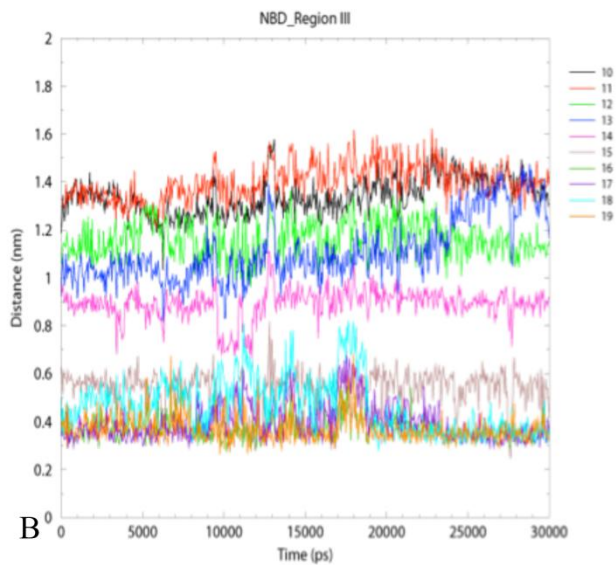

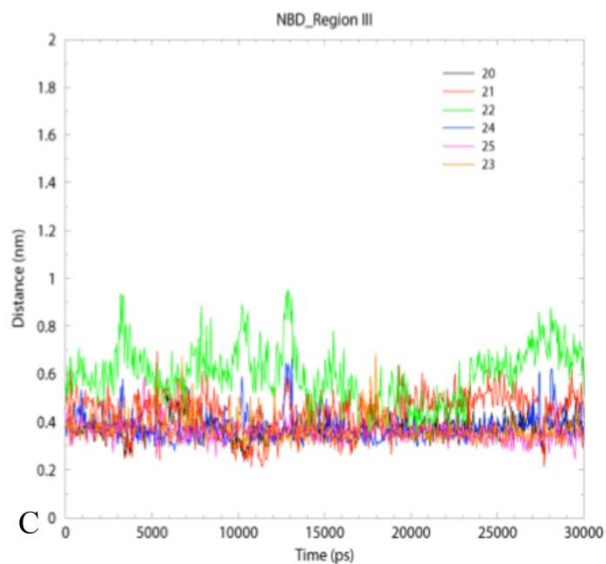

**Figure S10.** The pair wise residue (C- $\alpha$ ) distances between NBD Region III plotted for the 25 residues of the Phe-43 cavity for GPO3\_NBD. **A)** Residues are: 1-H105, 2-W112, 3-V255, 4-S256, 5-T257, 6-D368, 7-E370, 8-I371, 9-S375 **B)** Residues are: 10-F376, 11-N377, 12-F382, 13-Y384, 14-I424, 15-N425, 16-M426, 17-W427, 18-Q428, 19-E429 **C)** Residues are: 20-V430, 21-G431, 22-G472, 23-G473, 24-D474, 25-M475.

## Tables

Table S1

| Res. Num. | Res. Name | RMSD Mean | RMSD Std | Reg. I Mean | Reg. I STD | Reg. II Mean | Reg. II STD | Reg. III Mean | Reg. III STD |
|-----------|-----------|-----------|----------|-------------|------------|--------------|-------------|---------------|--------------|
| 1         | H105      | 0.11      | 0.02     | 0.99        | 0.10       | 0.80         | 0.10        | 0.75          | 0.14         |
| 2         | W112      | 0.06      | 0.02     | 0.59        | 0.16       | 0.89         | 0.21        | 1.24          | 0.20         |
| 3         | V255      | 0.08      | 0.05     | 0.33        | 0.02       | 0.65         | 0.08        | 1.03          | 0.10         |
| 4         | S256      | 0.04      | 0.03     | 0.38        | 0.05       | 0.60         | 0.09        | 0.97          | 0.07         |
| 5         | T257      | 0.06      | 0.02     | 0.38        | 0.03       | 0.45         | 0.08        | 0.81          | 0.09         |
| 6         | D368      | 0.08      | 0.04     | 0.86        | 0.07       | 0.69         | 0.11        | 0.70          | 0.16         |
| 7         | E370      | 0.08      | 0.04     | 0.41        | 0.07       | 0.44         | 0.11        | 0.78          | 0.20         |
| 8         | I371      | 0.12      | 0.06     | 0.72        | 0.10       | 0.66         | 0.18        | 1.07          | 0.09         |
| 9         | S375      | 0.07      | 0.00     | 0.33        | 0.03       | 0.63         | 0.09        | 0.79          | 0.12         |
| 10        | F376      | 0.10      | 0.05     | 0.40        | 0.05       | 0.89         | 0.07        | 1.34          | 0.08         |
| 11        | N377      | 0.03      | 0.01     | 0.41        | 0.06       | 0.95         | 0.07        | 1.40          | 0.07         |
| 12        | F383      | 0.10      | 0.05     | 0.30        | 0.03       | 0.71         | 0.07        | 1.16          | 0.08         |
| 13        | Y384      | 0.06      | 0.03     | 0.60        | 0.07       | 0.72         | 0.12        | 1.11          | 0.13         |
| 14        | I424      | 0.04      | 0.02     | 0.38        | 0.03       | 0.52         | 0.04        | 0.89          | 0.06         |
| 15        | N425      | 0.04      | 0.03     | 0.33        | 0.03       | 0.26         | 0.04        | 0.53          | 0.08         |
| 16        | M426      | 0.07      | 0.03     | 0.51        | 0.05       | 0.32         | 0.04        | 0.37          | 0.05         |
| 17        | W427      | 0.07      | 0.05     | 0.32        | 0.04       | 0.29         | 0.04        | 0.39          | 0.08         |
| 18        | Q428      | 0.07      | 0.04     | 0.66        | 0.08       | 0.51         | 0.06        | 0.46          | 0.12         |
| 19        | E429      | 0.09      | 0.02     | 0.81        | 0.07       | 0.54         | 0.07        | 0.37          | 0.05         |
| 20        | V430      | 0.07      | 0.04     | 1.03        | 0.05       | 0.69         | 0.05        | 0.38          | 0.05         |
| 21        | G431      | 0.01      | 0.01     | 0.77        | 0.05       | 0.54         | 0.05        | 0.45          | 0.08         |
| 22        | G472      | 0.03      | 0.01     | 0.79        | 0.10       | 0.63         | 0.10        | 0.59          | 0.12         |
| 23        | G473      | 0.03      | 0.01     | 0.57        | 0.11       | 0.31         | 0.06        | 0.37          | 0.06         |
| 24        | D474      | 0.09      | 0.03     | 0.67        | 0.09       | 0.35         | 0.06        | 0.36          | 0.04         |
| 25        | M475      | 0.07      | 0.04     | 0.81        | 0.07       | 0.54         | 0.07        | 0.37          | 0.05         |

Mean and standard deviation of residue interactions with Regions I, II and III over 30 ns trajectory for GPO3\_NBD measured in nm from the center of mass of the residue and the center of mass of NBD region I, II or III. Interaction distances < 0.40 and with low standard deviations reflect tight interactions. Residues with tight interaction for Region I are S375, F376, F382, I424, N425, W427; for Region II are N425, M426, and W427 and Region III are M426, W427, E429, V430, G473, D474 and M475.
